# Supplementary material for: Host, Weather and Virological Factors Drive Norovirus Epidemiology: Time-Series Analysis of Laboratory Surveillance Data in England and Wales
Source: PLOS journal article supplement (doi:10.1371/journal.pone.0006671), 2009-08-21

**Figure S2.** Sensitivity analysis. Rate ratios of temperature, relative humidity, new variants and immunity in the Final Model, model including year and month indicator variables (Model A), three , nine and twelve Fourier terms (Models B, C and D) and modelling weekly instead of daily data (Model E).

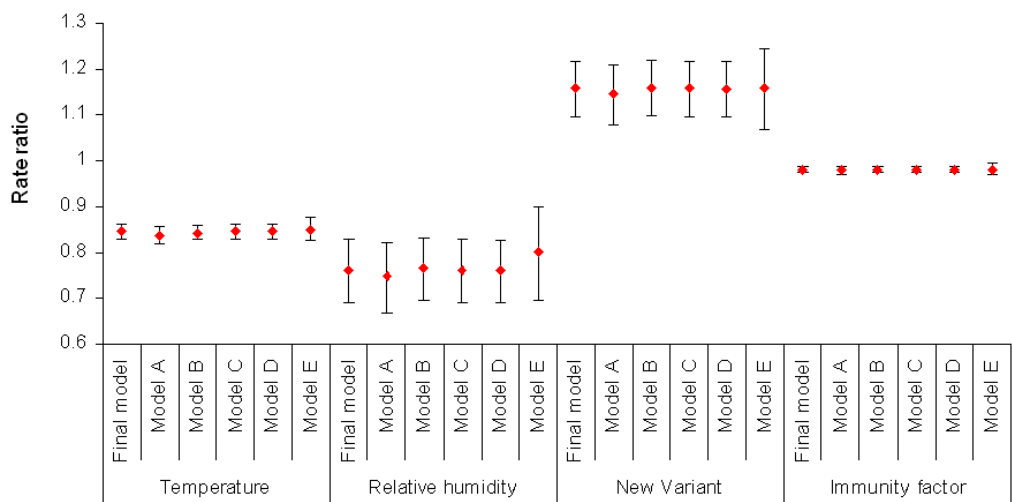

Supplement: S2 (10.1371/journal.pone.0006671.s002) [file journal.pone.0006671.s002]
